# Supplementary material for: Essential Oil Composition of Ten Species from Sect. Serpyllum of Genus Thymus Growing in Bulgaria
Source: MDPI journal article supplement (doi:10.3390/d15060759), 2023-06-08
Supplement: s1 [file s1]

## SUPPLEMENTARY MATERIAL

### Essential oil composition of ten species from sect. *Serpyllum* of genus *Thymus* growing in Bulgaria

Antoaneta Trendafilova<sup>1,\*</sup>, Milka Todorova<sup>1</sup>, Victoria Ivanova<sup>1</sup>, Petar Zhelev<sup>2</sup>, Ina Aneva<sup>3</sup>

<sup>1</sup> Institute of Organic Chemistry with Centre of Phytochemistry, Bulgarian Academy of Sciences, 1113 Sofia, Bulgaria; [Antoaneta.Trendafilova@orgchm.bas.bg](mailto:Antoaneta.Trendafilova@orgchm.bas.bg); [mtodorova753@gmail.com](mailto:mtodorova753@gmail.com) ; [Viktoria.Genova@orgchm.bas.bg](mailto:Viktoria.Genova@orgchm.bas.bg)

<sup>2</sup> University of Forestry, 1797 Sofia, Bulgaria; [zhelev@ltu.bg](mailto:zhelev@ltu.bg)

<sup>3</sup> Institute of Biodiversity and Ecosystem Research, Bulgarian Academy of Sciences, 1113 Sofia, Bulgaria; [ina.aneva@abv.bg](mailto:ina.aneva@abv.bg)

\* Correspondence: [Antoaneta.Trendafilova@orgchm.bas.bg](mailto:Antoaneta.Trendafilova@orgchm.bas.bg)

**Table S1.** Literature survey of the main components in the essential oils of different *Thymus* species from sect. *Serpyllum*

| Species                                                           | Country                | Main component                       | Other prominent components                                                            | Reference |
|-------------------------------------------------------------------|------------------------|--------------------------------------|---------------------------------------------------------------------------------------|-----------|
| <i>Thymus jankae</i> Cel.                                         | Kosovo                 | Thymol (45.78 %)                     | $\alpha$ -Terpinene (14.64 %), borneol (7.98 %), thymol methyl ether (7.75 %)         | [7]       |
|                                                                   |                        | $\beta$ -Caryophyllene (33.26%)      | Caryophyllene oxide (21.83 %), $\alpha$ -pinene (8.25 %), $\alpha$ -humulene (6.78 %) | [7]       |
| <i>Thymus jankae</i>                                              | Kosovo                 | Linalool acetate (19.89 %)           | Carvacrol (13.84 %), linalool (10.33 %)                                               | [8]       |
| <i>Thymus jankae</i> Chel. var. <i>jankae</i>                     | N. Macedonia           | Linalool (28.1-35.6 %)               | Geranial (15.3-20.2 %), $\alpha$ -terpinyl acetate (11.10 %)                          | [9]       |
| <i>Thymus jankae</i> Chel. var. <i>pantotrichus</i> Ronn          | N. Macedonia           | Linalool (30.4-30.9 %)               | Geranial (16.0-22.6 %), $\beta$ -pinene (8.0-9.9 %)                                   | [9]       |
| <i>Thymus jankae</i> Chel. var. <i>patentipilus</i> Lyka          | N. Macedonia           | Linalool (31.2 %)                    | Geranial (24.9 %), $\beta$ -pinene (8.9 %)                                            | [9]       |
| <i>Thymus jankae</i> Celak.                                       | Bosnia and Herzegovina | Linalool acetate (28.7 %)            | Linalool (14.4 %)                                                                     | [10]      |
| <i>Thymus praecox</i> Opiz subsp. <i>jankae</i> (Celak.)<br>Jalas | Serbia                 | (E)-Caryophyllene (14.6 %)           | Thymol (10.7 %), linalool (9.2 %), myrcene (6.2 %), $\alpha$ -pinene (7.8 %)          | [11]      |
| <i>Thymus praecox</i> Opiz subsp. <i>jankae</i> (Celak.)<br>Jalas | Bulgaria               | $\alpha$ -Terpineol acetate (20.1 %) | Linalool (17.7 %), $\alpha$ -terpineol (9.8 %), (E)-caryophyllene (7.9 %)             | [11]      |
| <i>Thymus glabrescens</i> Willd.                                  | Croatia                | 1,8-Cineole (29.42 %)                | $\beta$ -Myrcene (8.86 %)                                                             | [12]      |
|                                                                   |                        | Thymol acetate (14.34 %)             | Carvacrol (10.71 %), p-cymene (10.03 %), thymol (8.44 %)                              | [12]      |
| <i>Thymus glabrescens</i> Willd                                   | Hungary                | Thymol (34.2 %)                      | $\gamma$ -Terpinene (16.4 %), p-cymene (16.4 %)                                       | [13]      |
|                                                                   |                        | Germacrene D (55.4 %)                | $\beta$ -Caryophyllene (14.8 %)                                                       | [13]      |
|                                                                   |                        | Thymol (32.9 %)                      | $\beta$ -Caryophyllene (16.5 %)                                                       | [13]      |
|                                                                   |                        | $\alpha$ -Cubebene (50.9 %)          | $\beta$ -Caryophyllene (22.9 %)                                                       | [13]      |

|                                     |         |                                 |                                                                              |      |
|-------------------------------------|---------|---------------------------------|------------------------------------------------------------------------------|------|
|                                     |         | Geraniol (49.0 %)               | Germacrene D (13.6%)                                                         | [13] |
|                                     |         | p-Cymene (45.0 %)               | Geraniol (13.6 %), linalyl acetate (9.9 %)                                   | [13] |
|                                     |         | Thymol (14.4 %)                 | Germacrene (12.1 %), geraniol (10.8 %)                                       | [13] |
|                                     |         | Thymol (29.3 %)                 | Germacrene D (14.2 %)                                                        | [13] |
| <i>Thymus glabrescens</i> Willd.    | Hungary | Germacrene D (17.8 %)           | Nerolidol (13.0 %), $\beta$ -cadinene (12.9 %), $\beta$ -bisabolene (9.2 %)  | [14] |
|                                     |         | $\beta$ -Caryophyllene (36.7 %) | Caryophyllene-oxide (27.7 %), germacrene D (15.8 %), E, E-farnesol (11.6 %)  | [14] |
|                                     |         | Germacrene D (56.9 %)           | $\beta$ -Farnesene (9.0 %)                                                   | [14] |
| <i>Thymus glabrescens</i> Willd.    | Hungary | Thymol (32.9 %)                 | $\beta$ -Caryophyllene (16.5 %), germacrene D (13.5 %)                       | [15] |
|                                     |         | Thymol (34.0 %)                 | p-Cymene (22.9 %)                                                            | [15] |
| <i>Thymus glabrescens</i> Willd.    | Romania | Farnesol (14.59 %)              | Nerolidol (13.83 %), terpinen-4-ol (7.49 %), elemol (7.40 %)                 | [16] |
| <i>Thymus glabrescens</i> Willd.    | Romania | Geraniol (55.5 %)               | Neryl acetate (11.1 %), $\beta$ -bisabolene (6.7 %)                          | [17] |
| <i>Thymus glabrescens</i> Willd.    | Romania | Thymol (22.28 - 55.12 %)        | $\gamma$ -Terpinene (22.23 %), p-cymene (14.03 %)                            | [18] |
| <i>Thymus glabrescens</i> Willd.    | Romania | Terpinyl acetate (47.6 %)       | Thymol (19.5 %), carvacrol (7.3 %)                                           | [19] |
| <i>Thymus glabrescens</i> Willd.    | Serbia  | Thymol (29.92 %)                | $\gamma$ -Terpinene (25.21 %), p-cymene (14.36 %), linalyl acetate (8.55 %)  | [20] |
|                                     |         | Thymol (55.12 %)                | p-Cymene (11.05 %), $\gamma$ -terpinene (6.37 %)                             | [20] |
|                                     |         | Thymol (48.03 %)                | p-Cymene (13.53 %), $\gamma$ -terpinene (6.99 %)                             | [20] |
|                                     |         | $\gamma$ -Terpinene (38.54 %)   | Thymol (22.28 %), p-cymene (17.75 %)                                         | [20] |
| <i>Thymus glabrescens</i> Willd.    | Serbia  | $\gamma$ -Terpinene (33.98 %)   | p-Cymene (15.22 %), thymol (25.96 %)                                         | [21] |
|                                     |         | Thymol (29.92%)                 | $\gamma$ -Terpinene (25.21 %), p-cymene (14.36 %)                            | [21] |
|                                     |         | $\gamma$ -Terpinene (38.54 %)   | Thymol (22.28 %), p-cymene (17.75 %)                                         | [21] |
|                                     |         | Thymol (55.12 %)                | p-Cymene (11.05 %), $\gamma$ -terpinene (6.37 %)                             | [21] |
|                                     |         | Thymol (49.48 %)                | p-cymene (11.75 %), $\gamma$ -terpinene (7.50 %)                             | [21] |
| <i>Thymus glabrescens</i> Willd.    | Serbia  | Thymol (55.4 %)                 | Geraniol (16.5 %), $\gamma$ -terpinene (5.9 %)                               | [11] |
| <i>Thymus glabrescens</i> Willd.    | Serbia  | Geraniol (22.33 %)              | Geranyl acetate (19.4 %), thymol (13.8 %), linalool (5.5 %)                  | [22] |
| <i>Thymus longicaulis</i> C. Presl. | Croatia | Thymol (40.05 %)                | p-Cymene (26.30 %), carvacrol (7.93 %)                                       | [12] |
| <i>Thymus longicaulis</i> C. Presl. | Croatia | Thymol (46.3 %)                 | $\gamma$ -Terpinene (16.2 %), thymol methyl ether (11.4 %), p-cymene (9.4 %) | [23] |
| <i>Thymus longicaulis</i> L.        | Greece  | Carvacrol (60.82 %)             | p-Cymene (6.58 %), $\gamma$ -terpinene (4.93 %)                              | [24] |

|                                                                                                                                          |        |                                         |                                                                                                                      |      |
|------------------------------------------------------------------------------------------------------------------------------------------|--------|-----------------------------------------|----------------------------------------------------------------------------------------------------------------------|------|
|                                                                                                                                          |        | Geraniol (27.4 %)                       | Carvacrol (19.77 %),<br>thymol (8.65 %)                                                                              | [24] |
| <i>Thymus longicaulis</i>                                                                                                                | Greece | Carvacrol (15.7 %)                      | Geraniol (10.7 %),<br>linalool (7.1 %)                                                                               | [25] |
|                                                                                                                                          |        | Carvacrol (60.9 %)                      | p-Cymene (6.6 %), $\gamma$ -<br>terpinene (4.9 %)                                                                    | [25] |
|                                                                                                                                          |        | Carvacrol (15.9 %)                      | $\gamma$ -Terpinene (13.0 %),<br>borneol (8.5 %)                                                                     | [25] |
|                                                                                                                                          |        | Geraniol (42.1 %)                       | Thymol (20.6 %),<br>geranyl acetate (10.5 %)                                                                         | [25] |
|                                                                                                                                          |        | Geraniol (27.4 %)                       | Carvacrol (19.8 %),<br>thymol (8.7 %)                                                                                | [25] |
|                                                                                                                                          |        | Thymol (32.4 %)                         | Carvacrol (17.4 %), $\gamma$ -<br>terpinene (11.7 %)                                                                 | [25] |
| <i>Thymus longicaulis</i> C. Presl.                                                                                                      | Italy  | Geraniol (34.2 %)                       | Carvacrol (14.5 %),<br>carvacrol acetate (13.6<br>%), thymol (9.3 %)                                                 | [26] |
|                                                                                                                                          |        | Thymyl acetate (12.8 %)                 | p-Cymene (9.0%), T-<br>cadinol (9.2%)                                                                                | [26] |
| <i>Thymus longicaulis</i> Presl.                                                                                                         | Kosovo | Thymol (15.26 %)                        | Carvacrol (12.65%), p-<br>cymene (9.45%), $\beta$ -<br>phellandrene (9.76%), $\alpha$ -<br>terpinyl acetate (11.74%) | [27] |
|                                                                                                                                          |        | $\alpha$ -Terpineol (14.23 %)           | $\alpha$ -Terpinyl acetate (11.81<br>%), linalool (9.63 %),<br>myrcene (6.59 %)                                      | [27] |
|                                                                                                                                          |        | $\alpha$ -Phellandrene (19.07 %)        | Linalool (14.22 %), $\beta$ -<br>caryophyllene (9.27 %),<br>limonene (7.83 %)                                        | [27] |
| <i>Thymus longicaulis</i>                                                                                                                | Kosovo | linalool (37.69 %)                      | geraniol (17.73 %) $\beta$ -<br>myrcene (5.87 %)                                                                     | [8]  |
| <i>Thymus longicaulis</i>                                                                                                                | Serbia | $\alpha$ -Terpinyl acetate (67.52<br>%) | Thymol (4.47 %),<br>limonene (3.58 %), $\alpha$ -<br>terpineol (3.43 %)                                              | [28] |
| <i>Thymus longicaulis</i> C. Presl.                                                                                                      | Turkey | $\alpha$ -Terpinyl acetate (37.98<br>%) | Thymol (16.76 %), p-<br>cymene (15.1 %)                                                                              | [29] |
| <i>Thymus longicaulis</i> C. Presl subsp. <i>chaubardii</i><br>(Reichenb. fd.) J alas                                                    | Greece | Geraniol (56.8 %)                       | Geranyl acetate (7.6 %),<br>nerol (6.3 %)                                                                            | [30] |
|                                                                                                                                          |        | Linalool (63.1 %)                       | $\alpha$ -Terpinyl acetate (20.4<br>%), $\alpha$ -terpineol (7.8 %)                                                  | [30] |
|                                                                                                                                          |        | Thymol (19.4 %)                         | Limonene (18.7 %),<br>borneol (6.7 %)                                                                                | [30] |
| <i>Thymus longicaulis</i> C.Presl subsp. <i>chaubardii</i><br>(Boiss. et Heldr. ex Reichb. fil.) J alas var.<br><i>alternatus</i> J alas | Turkey | Thymol (69.72 %)                        | Carvacrol (3.32 %), p-<br>cymene (4.52 %), $\gamma$ -<br>terpinene (4.96 %),                                         | [31] |
| <i>Thymus longicaulis</i> C.Presl subsp. <i>chaubardii</i><br>(Boiss. et Heldr. ex Reichb. fil.) J alas var.<br><i>chaubardii</i>        | Turkey | Thymol (66.85 %)                        | Carvacrol (7.31 %), p-<br>cymene (5.02 %), $\gamma$ -<br>terpinene (3.0 4%)                                          | [31] |
| <i>Thymus longicaulis</i> C. Presl. subsp. <i>chaubardii</i><br>(Boiss. et Heldr. ex Reichb. fil.) J alas var.<br><i>chaubardii</i>      | Turkey | Thymol (42.8 %)                         | p-Cymene (14.3 %), $\gamma$ -<br>terpinene (11.3 %),<br>borneol (7.2 %)                                              | [32] |
|                                                                                                                                          |        | Thymol (56.6 %)                         | p-Cymene (9.8 %), $\gamma$ -<br>terpinene (7.1 %)                                                                    | [32] |
| <i>Thymus longicaulis</i> C.Presl subsp. <i>longicaulis</i>                                                                              | Italy  | Thymol (37.2 %)                         | p-Cymene-(23.9 %), $\gamma$ -<br>terpinene (12.2 %)                                                                  | [33] |
|                                                                                                                                          |        | Thymol (32.1 %)                         | p-Cymene-(26.5 %), $\gamma$ -<br>terpinene (11.2 %)                                                                  | [33] |
|                                                                                                                                          |        | p-Cymene (34.9 %)                       | Thymol (21.8 %), $\gamma$ -<br>terpinene (16.2 %)                                                                    | [33] |

|                                                                                                        |                        |                                      |                                                                                                          |      |
|--------------------------------------------------------------------------------------------------------|------------------------|--------------------------------------|----------------------------------------------------------------------------------------------------------|------|
|                                                                                                        |                        | Carvacrol (37.9 %)                   | p-Cymene (28.6 %), $\gamma$ -terpinene (12.3 %)                                                          | [33] |
| <i>Thymus longicaulis</i> C. Presl var. <i>longicaulis</i>                                             | Italy                  | $\alpha$ -Terpineol (24.9 %)         | Myrcene (12.0 %), p-cymene (10.2 %), nerolidol (9.1 %), thymol (6.7 %)                                   | [34] |
|                                                                                                        |                        | Carvacrol (22.0 %)                   | Thymol (8.1 %), $\alpha$ -pinene (6.7 %), limonene (5.5 %),                                              | [34] |
|                                                                                                        |                        | Myrcene (24.6 %)                     | Bornyl acetate (23.8 %), thymol (13.9 %), limonene (18.8 %), $\beta$ -pinene (7.8 %), L-fenchone (7.8 %) | [34] |
| <i>Thymus longicaulis</i> C. Presl subsp. <i>longicaulis</i> var. <i>longicaulis</i>                   | Turkey                 | $\gamma$ -Terpinene (27.80 %)        | Thymol (27.65 %), p-cymene (19.38 %)                                                                     | [35] |
| <i>Thymus longicaulis</i> C. Presl. subsp. <i>longicaulis</i>                                          | Turkey                 | Thymol (53.0 %)                      | p-Cymene (18.33 %)                                                                                       | [36] |
|                                                                                                        |                        | $\alpha$ -Terpinyl acetate (82.07 %) | Limonene (4.52 %)                                                                                        | [36] |
|                                                                                                        |                        | Geraniol (68.79 %)                   | Geraniol acetate (16.41 %)                                                                               | [36] |
| <i>Thymus longicnulis</i> C. Presl. var. <i>subisophyllus</i> (Borbas) Jalas.                          | Turkey                 | Thymol (21.73 %)                     | Borneol (15.84 %), p-cymene (15.39 %)                                                                    | [37] |
| <i>Thymus longicnulis</i> var. <i>subisophyllus</i>                                                    | Turkey                 | Linalyl acetate (63.0 %)             | Linalool (11.0 %)                                                                                        | [38] |
|                                                                                                        |                        | Thymol (52 - 58 %)                   |                                                                                                          | [38] |
|                                                                                                        |                        | Thymol (26 %)                        | Carvacrol (26 %), $\gamma$ -terpinene (14 %),                                                            | [38] |
| <i>Thymus longicaulis</i> C. Presl. subsp. <i>longicaulis</i> var. <i>subisophyllus</i> (Borbas) Jalas | Turkey                 | Carvacrol (60.0 %)                   | Thymol (7.0 %), $\beta$ -bisabolene (4.8 %), borneol (4.7 %)                                             | [32] |
| <i>Thymus moesiacus</i> Velen.                                                                         | Bosnia and Herzegovina | $\gamma$ -Muurolene (24.7 %)         | Thymol (8.6 %), bornyl acetate (8.3 %)                                                                   | [39] |
|                                                                                                        |                        | Thymol (18.3 %)                      | Linalool (14.5 %), terpinen-4-ol (9.7 %)                                                                 | [39] |
| <i>Thymus moesiacus</i> Velen.                                                                         | Bulgaria               | Linalyl acetate (52.4 %)             | <i>epi</i> - $\alpha$ -Cadinol (10.8 %), linalool (7.1 %)                                                | [39] |
| <i>Thymus moesiacus</i>                                                                                | Kosovo                 | Thymol (13.97 -19.0 %)               | Geraniol (13.82 %), linalool (6.86 %)                                                                    | [8]  |
|                                                                                                        |                        | Carvacrol (22.33 %)                  | Geraniol (13.11 %), linalool (10.61 %)                                                                   | [8]  |
| <i>Thymus moesiacus</i> Velen.                                                                         | N. Macedonia           | Geraniol (32.06 %)                   | Geranyl acetate (16.75 %), carvacrol (12.31 %)                                                           | [40] |
|                                                                                                        |                        | Geraniol (33.27 %)                   | Carvacrol (12.81 %), geranyl acetate (11.75 %)                                                           | [40] |
|                                                                                                        |                        | Linalool (25.02 %)                   | Geraniol (14.87 %), carvacrol (13.31 %)                                                                  | [40] |
| <i>Thymus pannonicus</i>                                                                               | Czech Republic         | Carvacrol (50.1 %)                   | m-Cymene (16.9 %), $\gamma$ -terpinene (11.2 %), thymol methyl ether (6.3 %)                             | [41] |
| <i>Thymus pannonicus</i> All.                                                                          | Hungary                | Thymol (25 – 41 %)                   | p-Cymene (17-38 %)                                                                                       | [42] |
| <i>Thymus pannonicus</i> All.                                                                          | Hungary                | Thymol (24.6-67.5 %)                 |                                                                                                          | [43] |
|                                                                                                        |                        | Thymol (28.4-63.7 %)                 | $\gamma$ -Terpinene (9.7-20.9 %), p-cymene (11.5-31.8 %)                                                 | [43] |
|                                                                                                        |                        | Thymol (36.5-63.7 %)                 | p-Cymene (11.5-27.3 %)                                                                                   | [43] |
|                                                                                                        |                        | Thymol (36.5 %)                      | p-Cymene (27.3 %), neral (11.2 %)                                                                        | [43] |
|                                                                                                        |                        | Thymol (38.5 %)                      | p-Cymene (20.6 %), $\gamma$ -terpinene (12.0 %), $\beta$ -                                               | [43] |

|                               |         |                                                  |                                                                                                 |      |
|-------------------------------|---------|--------------------------------------------------|-------------------------------------------------------------------------------------------------|------|
|                               |         |                                                  | bisabolene (10.3 %)                                                                             |      |
|                               |         | Thymol (41.9 %)                                  | p-Cymene (20.2 %), isoborneol (10.3 %), $\gamma$ -terpinene (9.9 %)                             | [43] |
|                               |         | Thymol (27.9 %)                                  | Linalyl acetate (18.8%), $\gamma$ -terpinene (18.6 %), $\alpha$ -cubebene (13.9%)               | [43] |
|                               |         | p-Cymene (45.0 %),                               | Geraniol (13.6 %), linalyl acetate (9.9 %)                                                      | [43] |
|                               |         | Linalyl acetate (36.2 %)                         | Geranyl acetate (20.2 %)                                                                        | [43] |
|                               |         | Germacrene D (43.4 %)                            | $\beta$ -caryophyllene (15.0 %)                                                                 | [43] |
|                               |         | Caryophyllene oxide (45.2 %)                     | $\alpha$ -Cubebene (15.7 %), linalool (13.8 %)                                                  | [43] |
|                               |         | Germacrene D (29.7 %)                            | $\beta$ -Caryophyllene (22.0 %), farnesol (10.4 %)                                              | [43] |
| <i>Thymus pannonicus</i> All. | Hungary | Thymol (40.9-42.8 %)                             | p-Cymene (16.0 - 16.1 %), thymol methyl ether (8.1 - 10.2 %), $\gamma$ -terpinene (7.2 - 7.6 %) | [44] |
|                               |         | Thymol (51.6 - 53.4 %)                           | p-Cymene (14.6 -15.3 %), $\gamma$ -terpinene (13.4 - 15.3 %)                                    | [44] |
|                               |         | Thymol (50.7 %)                                  | Thymol methyl ether (20.8 %), p-cymene (11.0 %)                                                 | [44] |
|                               |         | Thymol (46.3 %)                                  | p-Cymene (10.2 %), $\gamma$ -terpinene (7.2%), <i>trans</i> -sabinene hydrate (6.3%)            | [44] |
|                               |         | Thymol (56.2 %)                                  | Thymol methyl ether (12.9 %), $\beta$ -bisabolene (8.5 %)                                       | [44] |
|                               |         | Thymol (52.7 %)                                  | Thymol methyl ether (10.9 %), p-cymene (8.4 %), $\beta$ -bisabolene (5.5 %)                     | [44] |
| <i>Thymus pannonicus</i> All. | Hungary | Linalool (26.6 %)                                | thymol (22.3 %), p-cymene (14.6 %), $\gamma$ -terpinene (11.1 %)                                | [14] |
|                               |         | Carvacrol (40.7 %)                               | p-Cymene (15.9 %), $\gamma$ -terpinene (13.7 %)                                                 | [14] |
|                               |         | Thymol (38.2 %)                                  | $\gamma$ -Terpinene (12.1 %), $\beta$ -bisabolene (11.3 %)                                      | [14] |
|                               |         | Thymol (26.1 %)                                  | Geraniol (23.5%), geranyl acetate (12.7 %), $\beta$ -bisabolene (10.5 %)                        | [14] |
|                               |         | $\beta$ -Cadinene (28.8 %)                       | Germacrene D (13.2 %)                                                                           | [14] |
| <i>Thymus pannonicus</i> All. | Hungary | Linalyl acetate (36.2 %)                         | Geranyl acetate (20.2%)                                                                         | [15] |
|                               |         | Thymol (48.0-53.0 %)                             | $\gamma$ -Terpinene (7.1-11.0 %), p-cymene (5.9-15.8 %)                                         | [15] |
| <i>Thymus pannonicus</i>      | Kosovo  | Germacrene D (17.98 %)                           |                                                                                                 | [8]  |
| <i>Thymus pannonicus</i> L.   | Romania | $\alpha$ -Terpinyl acetate (48.83 %)             | Germacrene D (12.12 %)                                                                          | [45] |
| <i>Thymus pannonicus</i> All. | Romania | $\alpha$ -Terpinyl acetate (48.83 %)             | Germacrene D (12.12 %), caryophyllene oxide (6.35 %)                                            | [46] |
| <i>Thymus pannonicus</i>      | Romania | Thymol (34.9 %)                                  | p-Cymene (12.0 %), $\gamma$ -terpinene (13.9 %)                                                 | [47] |
| <i>Thymus pannonicus</i> L.   | Romania | Germacrene D (8.05 - 17.3 %) in vegetative stage | Nerolidol (7.74 - 18.5 %), farnesol (12.95 - 14.77 %), $\alpha$ -terpinyl acetate               | [48] |

|                                                        |                |                                       |                                                                                                           |      |
|--------------------------------------------------------|----------------|---------------------------------------|-----------------------------------------------------------------------------------------------------------|------|
|                                                        |                |                                       | (6.56 - 9.58 %)                                                                                           |      |
|                                                        |                | Carvacrol (42.32 %) in anthesis stage | Thymol (13.98 %)                                                                                          | [48] |
| <i>Thymus pannonicus</i> All.                          | Serbia         | Geranial (41.42 %)                    | Neral (29.61 %)                                                                                           | [49] |
| <i>Thymus pannonicus</i> All.                          | Serbia         | Germacrene D (36.91 %)                | $\alpha$ -Pinene (13.88 %), $\beta$ -farnesene (6.96 %), E-caryophyllene (4.16 %)                         | [50] |
|                                                        |                | Geranial (51.74 %)                    | Neral (35.05 %)                                                                                           | [50] |
|                                                        |                | $\alpha$ -Pinene (19.90 %)            | Limonene (12.45 %), (E)- $\beta$ -ocimene (14.24 %), camphor (7.58 %)                                     | [50] |
| <i>Thymus pannonicus</i> All.                          | Serbia         | Geranial (39.24–46.34 %)              | Neral (29.92–35.62 %)                                                                                     | [51] |
|                                                        |                | Geranyl acetate (30.34 %)             | Geranial (29.18 %), neral (22.73 %)                                                                       |      |
| <i>Thymus pannonicus</i> ssp. <i>auctus</i> (Lyka) Soó | Romania        | Carvacrol (74.29 %)                   | Thymol (11.84 %)                                                                                          | [45] |
| <i>Thymus pannonicus</i> ssp. <i>pannonicus</i>        | Romania        | $\alpha$ -Terpinyl acetate (35.71 %)  | Myrcene (9.82 %), <i>trans</i> -nerolidol (10.1 %)                                                        | [45] |
| <i>Thymus pulegioides</i> L.                           | Croatia        | Thymol (21.72 %)                      | Carvacrol (9.54 %), p-cymene (7.72 %)                                                                     | [12] |
|                                                        |                | Carvacrol (29.79 %)                   | p-Cymene (15.10 %), $\gamma$ -terpinene (11.76 %), $\beta$ -caryophyllene (11.52 %)                       | [12] |
|                                                        |                | Linalool (49.42 %)                    | Carvacrol (13.12 %)                                                                                       | [12] |
| <i>Thymus pulegioides</i> L.                           | Croatia        | Geraniol (22.5 - 31.9 %)              | Thymol (14.8 - 21.0 %), linalool (8.0 - 11.3 %), $\gamma$ -terpinene (3.2 – 9.6 %)                        | [52] |
| <i>Thymus pulegioides</i> L.                           | Croatia        | Geraniol (44.7 %)                     | linalool (28.6 %), thymol (2.2 %)                                                                         | [53] |
|                                                        | Croatia        | Geraniol (48.6 %)                     | Eugenol (20.7 %)                                                                                          | [53] |
| <i>Thymus pulegioides</i> L.                           | Czech Republic | Carvacrol (56.0 %)                    | Thymol methyl ether (21.0 %), $\beta$ -linalool (6.3 %), m-cymene (7.2 %), $\gamma$ -terpinene (5.0 %)    | [41] |
|                                                        |                | Carvacrol (31.1 %)                    | m-Cymene (7.2 %), $\gamma$ -terpinene (6.4 %)                                                             | [41] |
|                                                        |                | Carvacrol (30.7 %)                    | Thymol methyl ether (8.2 %), cis-geraniol (7.7 %),                                                        | [41] |
|                                                        |                | Carvacrol (26.2 %)                    | $\gamma$ -Terpinene (8.0 %)                                                                               | [41] |
|                                                        |                | Thymol (54.8 %)                       | Carvacrol (13.4 %), m-cymene (10.1 %), $\gamma$ -terpinene (8.0 %)                                        | [41] |
|                                                        |                | $\beta$ -Linalool (26.4 %)            | Citral (14.0 %), $\alpha$ -himachalene (11.5 %), <i>trans</i> -geranial (10.6 %), $\beta$ -citral (9.6 %) | [41] |
| <i>Thymus pulegioides</i> L.                           | Denmark        | <i>cis</i> -Sabinene hydrate (63.2 %) | $\beta$ -caryophyllene (4.1%), myrcene (3.9%)                                                             | [54] |
|                                                        |                | <i>cis</i> -Sabinene hydrate (62.1 %) | $\gamma$ -Terpinene (6.8 %), myrcene (8.7 %)                                                              | [54] |
|                                                        |                | Carvacrol                             |                                                                                                           | [54] |
|                                                        |                | Carvacrol                             | Thymol                                                                                                    | [54] |
|                                                        |                | Carvacrol                             | Linalool                                                                                                  | [54] |
|                                                        |                | Carvacrol                             | Geraniol                                                                                                  | [54] |
|                                                        |                | Thymol                                | Geraniol                                                                                                  | [54] |
| <i>Thymus pulegioides</i> L.                           | Hungary        | Thymol (35.2 %)                       | Thymol methyl ether (25.2 %), p-Cymene (10.0 %), $\beta$ -bisabolene (8.6 %),                             | [44] |

|                              |           |                                            |                                                                                                                     |      |
|------------------------------|-----------|--------------------------------------------|---------------------------------------------------------------------------------------------------------------------|------|
|                              |           |                                            | $\gamma$ -terpinene (6.9 %)                                                                                         |      |
|                              |           | Thymol (50.4 %)                            | p-Cymene (9.6 %),<br>thymol methyl ether (9.2 %),<br>carvacrol methyl ether (8.6 %),<br>$\beta$ -bisabolene (7.4 %) | [44] |
|                              |           | Germacrene D (16.2 %)                      | $\beta$ -Cadinene (13.6 %),<br>thymol (11.7 %),<br>$\beta$ -bisabolene (9.6 %)                                      | [44] |
|                              |           | Elemol (14.6 %)                            | Germacrene D (11.2 %),<br>thymol (7.8 %)                                                                            | [44] |
|                              |           | $\beta$ -Cadinene (28.4 %)                 | Germacrene D (18.8 %),<br>$\beta$ -bisabolene (7.8 %)                                                               | [44] |
| <i>Thymus pulegioides</i> L. | Hungary   | Thymol (16.3 %)                            | $\beta$ -Cadinene (13.9 %),<br>germacrene D (12.0 %)                                                                | [15] |
|                              |           | p-Cymene (18.7 %)                          | Spathulenol (16.1 %),<br>geraniol (14.0 %)                                                                          | [15] |
|                              |           | Thymol (50.3 %)                            | p-Cymene (9.6 %),<br>thymol methyl ether (9.2 %)                                                                    | [15] |
|                              |           | p-Cymene (18.7 %)                          | Spathulenol (16.1 %),<br>geraniol (14.0 %)                                                                          | [15] |
|                              |           | Unknown sesquiterpene (53.2 %)             | $\beta$ -Cubene (19.2 %)                                                                                            | [15] |
| <i>Thymus pulegioides</i> L. | Hungary   | Thymol (27.4 %)                            | Carvacrol (26.7 %),<br>terpinyl acetate (13.3 %)                                                                    | [19] |
| <i>Thymus pulegioides</i> L. | Italy     | Thymol (26.8 %)                            | p-Cymene (20.4 %), $\gamma$ -terpinene (14.6 %)                                                                     | [55] |
| <i>Thymus pulegioides</i> L. | Italy     | Thymol (21.8 %)                            | p-Cymene (17.6 %),<br>thymol methyl ether (10.4 %),<br>$\beta$ -caryophyllene (5.9 %)                               | [26] |
|                              |           | Thymol (26.3 %)                            | p-Cymene (19.9 %),<br>$\beta$ -caryophyllene (7.5 %)                                                                | [26] |
| <i>Thymus pulegioides</i> L. | Italy     | Thymol (36.88 %)                           | $\gamma$ -Terpinene (9.16 %)                                                                                        | [56] |
|                              |           | Thymol (37.66 %)                           |                                                                                                                     | [56] |
|                              |           | Geraniol (35.64%)                          |                                                                                                                     | [56] |
| <i>Thymus pulegioides</i> L. | Lithuania | $\alpha$ -Terpenyl acetate (60.3 %)        | $\beta$ -Caryophyllene (8.7 %)                                                                                      | [57] |
|                              |           | Geraniol (23.01 %)                         | $\beta$ -Caryophyllene (8.27 %),<br>linalool (7.7 %)                                                                | [57] |
|                              |           | Carvacrol (21.2 %)                         | $\beta$ -Caryophyllene (13.2 %),<br>$\beta$ -bisabolene (11.6 %)                                                    | [57] |
| <i>Thymus pulegioides</i> L. |           | $\alpha$ -Terpenyl acetate (49.5 - 70.4 %) | $\beta$ -Caryophyllene (6.2 - 11.5 %)                                                                               | [57] |
|                              |           | Geraniol (16.3 - 29.2 %)                   | Geraniol (9.7 - 16.1 %),<br>$\beta$ -caryophyllene (7.4 - 9.6 %),<br>linalool (9.1 - 13.7%)                         | [57] |
|                              |           | Carvacrol (16.0 - 25.5 %)                  | $\beta$ -Caryophyllene (11.4 - 15.8 %),<br>$\beta$ -bisabolene (11.1 - 12.2 %)                                      | [57] |
| <i>Thymus pulegioides</i> L. | Lithuania | Geraniol (23.2 %)                          | Geraniol (12.4 %),<br>$\beta$ -caryophyllene (9.4 %),<br>neral (5.5 %)                                              | [58] |
|                              |           | Geraniol (23.5 %)                          | $\beta$ -Caryophyllene (10.8 %),<br>$\beta$ -bisabolene (10.2 %)                                                    | [58] |
|                              |           | Geraniol (25.1 %)                          | $\beta$ -Caryophyllene (13.5 %),<br>$\beta$ -bisabolene (9.5 %)                                                     | [58] |
|                              |           | Geraniol (16.2 %)                          | Geraniol (14.2 %), $\beta$ -                                                                                        | [58] |

|                              |           |                                   |                                                                                             |      |
|------------------------------|-----------|-----------------------------------|---------------------------------------------------------------------------------------------|------|
|                              |           |                                   | caryophyllene (13.1 %),<br>β-bisabolene (12.2 %),<br>neral (10.2 %)                         |      |
|                              |           | Geranial (18.1 %)                 | Geraniol (14.4 %), neral<br>(12.4 %), β-<br>caryophyllene (10.1 %),                         | [58] |
|                              |           | Caryophyllene (18.0 %-<br>19.7 %) | β-Bisabolene (14.5-15.9<br>%), germacrene D (12.5-<br>14.6 %), E-nerolidol (8.2-<br>13.8 %) | [58] |
|                              |           | γ-Terpinene (15.5 - 17.2 %)       | p-Cymene (7.7 -17.0 %),<br>carvacrol (4.6-13.5 %), β-<br>caryophyllene (9.6-10.5<br>%)      | [58] |
|                              |           | Carvacrol (24.9 - 33.3 %)         | β-Caryophyllene (9.5-<br>14.9 %), β-bisabolene<br>(8.9 - 12.9 %)                            | [58] |
| <i>Thymus pulegioides</i> L. | Lithuania | Geraniol (37.0-48.7 %)            | Neral (8.6 -14.8 %), nerol<br>(11.6 - 19.4 %), geranial<br>(3.6 - 5.8 %)                    | [59] |
|                              |           | Linalool (60.9 - 73.5 %)          |                                                                                             | [59] |
|                              |           | Carvacrol (16.9 - 29.3 %)         | p-Cymene (5.5 - 11.3 %),<br>γ-terpinene (20.6 - 24.4<br>%)                                  | [59] |
| <i>Thymus pulegioides</i> L. | Lithuania | Carvacrol (23.71 %)               | p-Cymene (12.38 %), γ-<br>terpinene (15.47 %),<br>carvacrol methyl ether<br>(8.06 %)        | [60] |
|                              |           | Geraniol (55.99 %)                | Nerol (9.99 %), β-<br>caryophyllene (6.67 %)                                                | [60] |
|                              |           | α-Terpinyl acetate (64.22<br>%)   | α-Terpineol (14.34 %),<br>geraniol (3.80 %)                                                 | [60] |
| <i>Thymus pulegioides</i> L. | Lithuania | Carvacrol (27.4 %)                | γ-Terpinene (24.4 %)                                                                        | [61] |
|                              |           | Geraniol (43.0 %)                 | Geranial (19.4 %), neral<br>(14.8 %)                                                        | [61] |
|                              |           | Linalool (73.0 %)                 | γ-Terpinene (3.0 %),<br>carvacrol (2.1 %)                                                   | [61] |
| <i>Thymus pulegioides</i> L. | Lithuania | Geraniol (19.3 -43.8 %)           | Geranial (11.4-17.7 %),<br>neral (9.2-12.7 %)                                               | [62] |
|                              |           | Geranial (23.2 – 24.7 %)          | Neral (13.5 - 17.4 %),<br>geraniol (4.9 – 12.8 %)                                           | [62] |
|                              |           | Linalool (80.3 %)                 | β-Caryophyllene (5.7 %)                                                                     | [62] |
|                              |           | Thymol (26.1 %)                   | p-Cymene (10.2 %), γ-<br>terpinene (9.9 %)                                                  | [62] |
|                              |           | Carvacrol (24.9 -31.0%)           | γ -terpinene (14.9 - 22.1<br>%), p-cymene (5.2 - 16.7<br>%),                                | [62] |
|                              |           | γ-Terpinene (20.7 %)              | p-Cymene (13.4 %),<br>thymol (14. 2%),<br>carvacrol (12.4 %)                                | [62] |
| <i>Thymus pulegioides</i> L. | Lithuania | Thymol (11.9 -22.9 %)             | Carvacrol (8.9-22.6 %),<br>p-cymene (12.2-14.3 %),<br>γ-terpinene (16.0 %)                  | [63] |
|                              |           | Thymol (26.0 %)                   | p-Cymene (10.2 %), γ-<br>terpinene (9.9 %)                                                  | [63] |
|                              |           | Carvacrol (15.0 –30.0 %)          | γ-Terpinene (17.2 -37.4<br>%), p-cymene (7.5 -16.7<br>%),                                   | [63] |
|                              |           | Geraniol (14.8-35.1 %)            | Geranial (14.4-24.3 %),                                                                     | [63] |



|                                                                     |          |                                            |                                                                                                 |      |
|---------------------------------------------------------------------|----------|--------------------------------------------|-------------------------------------------------------------------------------------------------|------|
|                                                                     |          |                                            | nerol (5.4-7.8 %)                                                                               |      |
| <i>Thymus pulegioides</i> L.                                        | Portugal | Thymol (26.0 %)                            | Carvacrol (21.0 %), $\gamma$ -terpinene (8.8 %)                                                 | [64] |
| <i>Thymus pulegioides</i> L.                                        | Portugal | Thymol (40.0 %)                            | p-cymene (12.5%), $\gamma$ -terpinene (12.2 %), carvacrol (4.0 %)                               | [65] |
| <i>Thymus pulegioides</i> L.                                        | Romania  | Carvacrol (50.5 – 62.6 %)                  | p-cymene (5.8 - 7.1%), $\gamma$ -terpinene (9.8 – 9.9 %),                                       | [17] |
| <i>Thymus pulegioides</i> L.                                        | Romania  | Geranial ( $\alpha$ -Citral) (16.4 %)      | cis-Nerolidol (15.8%), Neral ( $\beta$ -citral) (12.49 %), germacrene D (9.77%)                 | [66] |
|                                                                     |          | $\tau$ -Cadinol (19.99 %)                  | Limonene (15.30 %), $\beta$ -bisabolene (4.94%)                                                 | [66] |
|                                                                     |          | Cyclofenchone (18.79 %)                    | Germacrene D (9.34 %), $\tau$ -cadinol (8.31 %), limonene (7.79 %)                              | [66] |
|                                                                     |          | Germacrene D (12.25 %)                     | Cyclofenchone (10.51%), cis-nerolidol (6.38 %)                                                  | [66] |
|                                                                     |          | Carvacrol (39.35 %)                        | Limonene (15.04 %)                                                                              | [66] |
| <i>Thymus pulegioides</i> L.                                        | Serbia   | Linalool acetate (40.2 %)                  | Thymol (20.1 %), $\gamma$ -terpinene (9.7 %)                                                    | [11] |
| <i>Thymus pulegioides</i> L.                                        | Serbia   | Geraniol (66.59 %)                         | Geranyl acetate (8.47 %), Nerol (5.18%)                                                         | [67] |
| <i>Thymus pulegioides</i> L.                                        | Slovakia | $\beta$ -Linalool (40.9 %)                 | $\beta$ -Bisabolene (19.6 %)                                                                    | [41] |
|                                                                     |          | $\beta$ -Linalool (27.1%)                  | $\beta$ -Bisabolene (23.6 %), citral (11.4 %)                                                   | [41] |
| <i>Thymus pulegioides</i> L. subsp. <i>chamaedys</i> (Fries) Gusul. | Slovakia | Carvacrol (32.9 %)                         | $\gamma$ -Terpinene (17.2 %), $\beta$ -caryophyllene (16.6 %), citral (9.3 %), p-cymene (9.0 %) | [68] |
|                                                                     |          | Thymol (20.8 %)                            | $\beta$ -Caryophyllene (15.2 %), $\gamma$ -terpinene (15.0 %), carvacrol (10.8 %)               | [68] |
|                                                                     |          | Fenchone (33.9 %)                          | $\beta$ -Caryophyllene (10.4 %), citral (6.2 %)                                                 | [68] |
|                                                                     |          | Linalool (54.8 %)                          | Citral (9.3 %), $\beta$ -caryophyllene (8.5 %),                                                 | [68] |
|                                                                     |          | Citral (29.1 %)                            | Geraniol (22.4 %), $\beta$ -caryophyllene (14.6 %)                                              | [68] |
| <i>Thymus pulegioides</i> L. subsp. <i>effusus</i>                  | France   | $\alpha$ -Terpinyl acetate (64.8 – 81.4 %) | $\alpha$ -Terpineol (4.7 – 20.2 %)                                                              | [69] |
| <i>Thymus pulegioides</i> L. spp. <i>montanus</i>                   | Kosovo   | Geraniol (34.5 %)                          | $\alpha$ -Terpinyl acetate (18.8 %), geranyl acetate (13.6 %)                                   | [7]  |
| <i>Thymus pulegioides</i> L. subsp. <i>similialpestris</i>          | France   | $\alpha$ -Terpinyl acetate (70.0 - 76.0 %) | $\alpha$ -Terpineol (3.5 – 15.7 %)                                                              | [69] |
|                                                                     |          | Carvacrol (41.7 -55.3 %)                   | $\gamma$ -Terpinene (14.0 -24.5 %)                                                              | [69] |
|                                                                     |          | Thymol (39.3 %)                            | Thymol methyl ether (15.5 %), $\gamma$ -terpinene (14.1 %)                                      | [69] |
| <i>Thymus sibthorpii</i> Benth.                                     | Greece   | Geraniol (30.09 %)                         | Linalool (22.95 %), citronellyl acetate (9.89 %)                                                | [70] |
|                                                                     |          | Geraniol (31.63 %)                         | Thymol (22.13 %), geranyl acetate (9.25 %)                                                      | [70] |
|                                                                     |          |                                            |                                                                                                 |      |
| <i>Thymus sibthorpii</i> Benth                                      | Turkey   | Thymol (34.8 %)                            | $\gamma$ -Terpinene (7.1 %), 5-                                                                 | [71] |

|                                                                         |              |                    |                                                                                                     |      |
|-------------------------------------------------------------------------|--------------|--------------------|-----------------------------------------------------------------------------------------------------|------|
|                                                                         |              |                    | methyl-3-heptanone (5.8 %)<br>p-cymene (6.0 %)                                                      |      |
| <i>Thymus sibthorpii</i>                                                | Turkey       | Thymol (25-50 %)   | p-Cymene (17-18 %)                                                                                  | [38] |
|                                                                         |              | Thymol (38%)       | p-Cymene (28%)                                                                                      | [38] |
|                                                                         |              | Carvacrol (39 %)   | p-Cymene (17 %)                                                                                     | [38] |
|                                                                         |              | Carvacrol (40 %)   | p-Cymene (22 %),<br>thymol (16 %)                                                                   | [38] |
| <i>Thymus thracicus</i> Velen.                                          | Turkey       | p-Cymene (25.44 %) | Carvacrol (18.21 %),<br>thymol (15.69 %), $\gamma$ -<br>terpinene (11.08 %)                         | [29] |
| <i>Thymus thracicus</i> Velen. var. <i>longgidens</i><br>(Velen.) Jalas |              | Geraniol (15.73 %) | Thymol (12.30 %), p-<br>cymene (12.17 %), $\gamma$ -<br>terpinene (10.75 %),<br>carvacrol (10.45 %) | [72] |
|                                                                         |              | Geraniol (47.31 %) | Geranyl acetate (18.25<br>%), camphor (3.61 %),<br>1,8-cineole (3.25 %)                             | [72] |
| <i>Thymus alsarensis</i> Ronn. (syn. <i>Thymus<br/>thracicus</i> Jalas) | N. Macedonia | Carvacrol (33.0 %) | Thymol (18.5 %), p-<br>cymene (8.9 %), terpinyl<br>acetate (7.4 %)                                  | [73] |
